# Supplementary material for: Novel detection of Theileria equi and Babesia caballi in Hippobosca equina from horses in Spain
Source: Research Square preprint supplement (doi:10.21203/rs.3.rs-5662716/v1), 2024-12-23
Supplement: Supplementary file 1 [file 9619104c8f6bd91e825d5ff5.docx]

| Horse ID | Sex | Residence area | Sampling date | EP result real-time PCR | EP result nested PCR | EP Clade | EP result cELISA (I%) |
| --- | --- | --- | --- | --- | --- | --- | --- |
| Horse 5 | Gelding | Segovia | 25/09/2023 | Negative | Negative | - | ***B. caballi*** (81,41%) |
| Horse 6* | Gelding | Segovia | 25/09/2023 | ***T. equi*** | ***T. equi*** | E | ***T. equi*** (52,60%) |
| 05/08/2024 | ***T. equi*** | ***T. equi*** | E | ***T. equi*** (55,44%)  ***B. caballi*** (56,28%) |
| Horse 7* | Mare | Segovia | 25/09/2023 | ***B. caballi*** | Negative | - | ***B. caballi*** (83,26%) |
| Horse 8 | Mare | Segovia | 25/09/2023 | ***B. caballi*** | ***B. caballi*** | A | ***B. caballi*** (78,35%) |
| Horse 9 | Gelding | Segovia | 25/09/2023 | ***T. equi*** | Negative | - | ***T. equi*** (68,26%)  ***B. caballi*** (85,04%) |
| 05/08/2024 | Negative | Negative | - | ***T. equi*** (67,83%)  ***B. caballi*** (85,02%) |
| Horse 10 | Mare | Segovia | 25/09/2023 | Negative | Negative | - | ***B. caballi*** (55,04%) |
| 05/08/2024 | Negative | Negative | - | Negative |
| Horse 14* | Mare | Segovia | 13/05/2024 | ***B. caballi*** | ***B. caballi*** | A | ***T. equi*** (66,75%)  ***B. caballi*** (82,17%) |
| 09/08/2024 | ***T. equi*** | ***T. equi*** | E | ***T. equi*** (65,87%)  ***B. caballi*** (83,85%) |
| Horse 15 | OS | Menorca Island | 01/07/2024 | Negative | Negative | - | Negative |
| Horse 16 | M | Menorca Island | 01/07/2024 | ***T. equi*** | Negative | - | ***T. equi*** (78,52%) |
| Horse 17 | F | Menorca Island | 01/07/2024 | Negative | ***T. equi*** | E | ***T. equi*** (86,64%) |
| Horse 18 | M | Menorca Island | 01/07/2024 | ***T. equi*** | Negative | - | ***T. equi*** (82,63%) |
| Horse 19 | M | Menorca Island | 01/07/2024 | ***T. equi*** | Negative | - | ***T. equi*** (74,56%) |
| Horse 20 | M | Menorca Island | 01/07/2024 | Negative | Negative | - | ***T. equi*** (80,91%) |
| Horse 21 | M | Menorca Island | 02/07/2024 | ***T. equi*** | ***T. equi*** | A | ***T. equi*** (73,48%) |
| Horse 22 | F | Menorca Island | 02/07/2024 | Negative | Negative | - | Negative |
| Horse 23 | F | Menorca Island | 02/07/2024 | Negative | Negative | - | ***T. equi*** (72,40%) |
| Horse 24 | OS | Menorca Island | 02/07/2024 | Negative | Negative | - | Negative |
| Horse 25 | OS | Menorca Island | 02/07/2024 | Negative | Negative | - | Negative |
| Horse 26 | F | Menorca Island | 02/07/2024 | Negative | Negative | - | Negative |
| Horse 27 | F | Menorca Island | 02/07/2024 | ***T. equi*** | ***T. equi*** | A | Negative |
| Horse 28 | F | Menorca Island | 02/07/2024 | Negative | Negative | - | ***T. equi* (50,01%)** |
| Horse 29 | M | Menorca Island | 02/07/2024 | Negative | Negative | - | ***T. equi* (73,93%)** |
| Horse 30 | F | Menorca Island | 03/07/2024 | Negative | Negative | - | ***T. equi* (58,21%)** |
| Horse 31 | OS | Menorca Island | 03/07/2024 | Negative | Negative | - | Negative |
| Horse 32 | OS | Menorca Island | 03/07/2024 | Negative | Negative | - | Negative |
| Horse 33 | F | Menorca Island | 03/07/2024 | Negative | Negative | - | ***T. equi*** (78,53%) |
| Horse 34 | M | Menorca Island | 03/07/2024 | Negative | Negative | - | ***T. equi*** (58,59%) |

**Supplementary material 1.** Characteristics of each blood-sampled horse (n = 27), including sex, residence area, and sampling date, as well as their blood test results for EP real-time PCR, nested PCR, EP clade, and cELISA. Horses sampled in association with positive EP flies are marked with an asterisk following their identification.
